# Supplementary material
Source: MDPI journal article supplement (https://www.mdpi.com/2571-9408/7/1/14)
Supplement: s1 [file s1]

## **Supplementary file S1. Studies made on the colors of Iberian manuscripts**

As the described in point 1.2 of the main text, the techniques allow the establishment of a molecular palette, and this work will compare the data obtained with the data from the color palette of the Ajuda Songbook. This manuscript has been previously associated with the Alfonsi production due to its iconography and high material quality, but one fundamental question about its identity remains obscure: where it was produced. The comparison between both scriptoria might shed light on this question.

The number of works that study the color palette used in manuscripts produced in the Iberian Peninsula is scarce, to the author's knowledge, and is presented on Table S1 and Table S2. Of the works found, the most ancient manuscript is from the 6-7<sup>th</sup> century, and their location is doubted (between Spain, Northern Africa, or Italy). Nonetheless, at least one third of the studies were made on Portuguese manuscripts, and the color palette found remains very similar in the 12<sup>th</sup> and 13<sup>th</sup> centuries. In the Ajuda Songbook, the same palette was uncovered with the most whopping discovery being the identification of brazilwood lake pigments, in contrast to the characteristic lac dye colors found in the Portuguese manuscripts. After the 14<sup>th</sup> century, there is a slight change in the pigments used, with the higher use of azurite and the introduction of other pigments. In fact, the knowledge of the molecular color palette of each manuscript, whose location and date are known, is indispensable to comprehend and study objects where this information is undefined or absent. By establishing the characteristic materials used through time, from the 12<sup>th</sup> to the 16<sup>th</sup> centuries per example, in a specific location, will widen the possibility of complementing missing information, as is the case for the Ajuda Songbook.

---

**Table S1** – Studies made in medieval illuminated manuscripts produced in the Iberian Peninsula, with a de-scription of the date, name or theme of the manuscript and its origin, colorants found divided by applied pure or in the mixture, techniques used to characterize them and respective reference.

| Date                                                       | Name   Theme                                                                                         | Origin                           | Colorants                                                                                                                                                                                                             | Techniques used                                              | Reference |
|------------------------------------------------------------|------------------------------------------------------------------------------------------------------|----------------------------------|-----------------------------------------------------------------------------------------------------------------------------------------------------------------------------------------------------------------------|--------------------------------------------------------------|-----------|
| 6 <sup>th</sup> -7 <sup>th</sup><br>9 <sup>th</sup> (mod.) | <i>Ashburnham Pentateuch</i>                                                                         | Spain, Northern Africa or Italy* | <b>Pure:</b> Iron-gall ink, indigo, Egyptian blue, carbon black, red ochre, yellow ochre, red lead, green earth, Verdigris <sup>o</sup> , madder, white lead, mixture of madder and Egyptian blue or indigo, orpiment | FORS, XRF, Spectrofluorimetry, Visible Induced Luminescence  | [1]       |
| 12 <sup>th</sup> -13 <sup>th</sup>                         | <i>Liber Feudorum Maior</i> (cartulary)                                                              | Catalonia                        | <b>Pure:</b> Lapis lazuli, vermilion, lead white, orpiment, organic yellow pigment, lead-based yellow, copper-based pigment, iron-gall ink, organic carbon-based ink                                                  | XRF, MA-XRF, Data treatment (PyMCA software)                 | [2]       |
|                                                            |                                                                                                      |                                  | <b>Mixture:</b> Lead white with yellow colourant                                                                                                                                                                      |                                                              |           |
| 1189                                                       | <i>Lorvão Apocalypse</i>                                                                             | Portugal                         | <b>Pure:</b> Vermilion, red lead, orpiment, black                                                                                                                                                                     | MicroEDXRF, microRaman, microFTIR                            | [3]       |
|                                                            |                                                                                                      |                                  | <b>Mixture:</b> Red lead with orpiment, vermilion with red lead or extenders, red lead with white lead                                                                                                                |                                                              |           |
| 12 <sup>th</sup> -13 <sup>th</sup>                         | Manuscripts from Santa Cruz de Coimbra, Santa Maria de Alcobaça and São Mamede do Lorvão monasteries | Portugal                         | <b>Pure:</b> Vermilion, red lead, orpiment, lad dye, lapis lazuli, indigo, white lead, carbon and bone black, bottle green, azurite and malachite                                                                     | microRaman, microFTIR, microXRF, microXRD                    | [4]       |
|                                                            |                                                                                                      |                                  | <b>Mixture:</b> Indigo with lapis lazuli, vermilion with lead chalk or red lead, organic dye with vermilion                                                                                                           |                                                              |           |
| 12 <sup>th</sup> -13 <sup>th</sup>                         | 15 manuscripts of Santa Maria de Alcobaça monastery                                                  | Portugal                         | <b>Pure:</b> Lapis lazuli, azurite, bottle-green, orpiment, red lead, yellow and red organic dyes, white lead, indigo                                                                                                 | microRaman, microFTIR, microEDXRF                            | [5]       |
|                                                            |                                                                                                      |                                  | <b>Mixture:</b> vermilion and/or organic red; carbon-based pigment with lead white, lapis lazuli with indigo or carbon. Based black pigment, vermilion with calcite, vermilion with lead white                        |                                                              |           |
| 12 <sup>th</sup> -13 <sup>th</sup>                         | <i>Alcobaça Beatus</i> (Alc.247)                                                                     | Portugal                         | <b>Pure:</b> Lapis lazuli, vermilion, red lead, white lead, bottle green, carbon black, lac dye                                                                                                                       | FORS, microRaman, microFTIR, Spectrofluorimetry              | [6]       |
|                                                            |                                                                                                      |                                  | <b>Mixture:</b> vermilion and gypsum, lac dye and gypsum                                                                                                                                                              |                                                              |           |
| 13 <sup>th</sup> -14 <sup>th</sup>                         | <i>Cancioneiro da Ajuda</i>                                                                          | Iberian Peninsula                | <b>Pure:</b> Lead white, red lead, vermilion, yellow ochre, mosaic gold, orpiment, lapis lazuli, indigo, azurite, carbon black                                                                                        | microXRF, microRaman, FTIR, FORS and microspectrofluorimetry | [7]       |
|                                                            |                                                                                                      |                                  | <b>Mixture:</b> brazilwood with calcium carbonate and lead white, brazilwood with gypsum. Lead white mixed with other pigment to control de hue                                                                       |                                                              |           |

\*There is doubt to which of the three places is the place of origin. | o occasional use

**Table S2** – Studies made in medieval illuminated manuscripts produced in the Iberian Peninsula, with a de-scription of the date, name or theme of the manuscript and its origin, colorants found divided by applied pure or in the mixture, techniques used to characterize them and respective reference.

| Date                               | Name   Theme                                                                                                                 | Origin                               | Colorants                                                                                                                      | Techniques used                                                                                 | Reference |
|------------------------------------|------------------------------------------------------------------------------------------------------------------------------|--------------------------------------|--------------------------------------------------------------------------------------------------------------------------------|-------------------------------------------------------------------------------------------------|-----------|
| 14 <sup>th</sup>                   | <i>Winter Breviary</i> (Alc.54)                                                                                              | Portugal                             | <b>Pure:</b> Azurite, vermilion, red lead, yellow ochre, brazilwood lake, orcein purple, carbon black, lead white and silver   | FORs, microRaman, microFTIR, microXRF                                                           | [8]       |
| 14 <sup>th</sup>                   | Cantoral                                                                                                                     | Puentedura, Burgos, Castile and Lion | <b>Pure:</b> Vermilion, lamp black and azurite                                                                                 | FT-RAMAN                                                                                        | [9]       |
| 14 <sup>th</sup> -15 <sup>th</sup> | Three cantorals                                                                                                              | Spain                                | <b>Pure:</b> Vermilion, azurite, saffron                                                                                       | FT-Raman                                                                                        | [10]      |
|                                    |                                                                                                                              |                                      | <b>Mixture:</b> Lamp black with manganese (IV) oxide, azurite with carbon black                                                |                                                                                                 |           |
| 13 <sup>th</sup> -16 <sup>th</sup> | <i>Cancioneiro da Ajuda</i> and<br><i>Lineage book</i><br><i>Winter Breviary</i> (Alc.54)<br><i>Fernão Vaz Dourado Atlas</i> | Iberian Peninsula;<br>Portugal       | <b>Pure:</b> brazilwood, orcein                                                                                                | FORs, MICROFTIR, SERS, microspectrofluorimetry, high-resolution mass spectrometry               | [11]      |
|                                    |                                                                                                                              |                                      | <b>Mixture:</b> Brazilwood with calcium carbonate and lead white, brazilwood with gypsum                                       |                                                                                                 |           |
| 1430-1450<br>1470                  | <i>Lisbon's General Chronicle of Spain</i> and <i>Chronicle of D.Duarte de Meneses</i>                                       | Portugal                             | <b>Pure:</b> copper-based pigment, red lead, malachite, lapis lazuli, azurite, animal anthraquinone, iron-gall ink             | Digital microscopy, h-EDXRF, FORs, MA-EDXRF                                                     | [12]      |
|                                    |                                                                                                                              |                                      | <b>Mixture:</b> Copper-pigment with lead white, dark brown ochre with lead white                                               |                                                                                                 |           |
| 1459                               | Privilegios rodados (nobility of Gil Fernandez)                                                                              | Castile and Lion                     | <b>Pure:</b> Iron-based ink, lead tin yellow type I, gamboge, azurite, indigo, vermilion, red lead, malachite and lead white** | Portable XRD/XRF, Raman spectroscopy, SEM-EDX and capillary electrophoresis (organic compounds) | [13]      |
|                                    |                                                                                                                              |                                      | <b>Mixture:</b> Indigo with azurite, lead with other colorants                                                                 |                                                                                                 |           |
| 1477, 1498**                       | Islamic judicial documents                                                                                                   | Granada                              | <b>Pure:</b> Iron-gall ink                                                                                                     | SEM-EDX                                                                                         | [14]      |
|                                    |                                                                                                                              |                                      | <b>Mixture:</b> Iron-gall ink with carbon black                                                                                |                                                                                                 |           |
| 1512                               | <i>Charter of Vila Flor</i>                                                                                                  | Portugal                             | <b>Pure:</b> Iron-based ink, vermilion, red lead, iron-gall ink, organic dye, azurite, lead white, malachite                   | microEDXRF, fluorescence microFTIR                                                              | [15]      |
|                                    |                                                                                                                              |                                      | <b>Mixture:</b> Azurite with lead white, vermilion with chalk                                                                  |                                                                                                 |           |

\*\*fifteen of the twenty one documents. The other six document don't have date.

## References

1. Aceto, M.; Calà, E.; Fenoglio, G.; Labate, M.; Denoël, C.; Operti, L.; Agostino, A. New Evidence of Non-Traditional Egyptian Blue Manufacture in the 6th Century *Ashburnham Pentateuch*. *J Archaeol Sci Rep* **2020**, *33*, 102487, doi:10.1016/j.jasrep.2020.102487.
2. Magkanas, G.; Bagán, H.; Sistach, M.C.; García, J.F. Illuminated Manuscript Analysis Methodology Using MA-XRF and NMF: Application on the Liber Feudorum Maior. *Microchemical Journal* **2021**, *165*, 106112, doi:10.1016/j.microc.2021.106112.
3. Miguel, C.; Claro, A.; Gonçalves, A.P.; Muralha, V.S.F.; Melo, M.J. A Study on Red Lead Degradation in a Medieval Manuscript *Lorvão Apocalypse* (1189). *Journal of Raman Spectroscopy* **2009**, *40*, 1966–1973, doi:10.1002/jrs.2350.
4. Melo, M.J.; Miranda, M.A.; Miguel, C.; Castro, R.; Claro, A.; Lemos, A.; Muralha, V.S.; Lopes, J.A.; Gonçalves, A.P. The Colour of Medieval Portuguese Illumination: An Interdisciplinary Approach. *Revista de História da Arte* **2011**, *W*, 153–173.
5. Muralha, V.S.F.; Miguel, C.; Melo, M.J. Micro-Raman Study of Medieval Cistercian 12–13th Century Manuscripts: Santa Maria de Alcobaça, Portugal. *Journal of Raman Spectroscopy* **2012**, *43*, 1737–1746, doi:10.1002/jrs.4065.
6. Miguélez Caverro, A.; Melo, M.J.; Miranda, M.A.; Castro, R.; Casanova, C. Beatus Manuscripts under the Microscope: The Alcobaca Beatus and the Iberian Cistercian Tradition Revisited. *J Mediev Iber Stud* **2016**, *8*, 217–251, doi:10.1080/17546559.2016.1221116.
7. Nabais, P.; Castro, R.; Lopes, G.V.; Sousa, L.C.; Melo, M.J. Singing with Light: An Interdisciplinary Study on the Medieval Ajuda Songbook. *J Mediev Iber Stud* **2016**, *8*, 283–312, doi:10.1080/17546559.2016.1234061.
8. Barreira, C.F.; Melo, M.J.; Araújo, R.; Casanova, C. Through the Eyes of Science and Art: A Fourteenth-Century Winter Breviary from Alcobaça Scriptorium. *J Mediev Iber Stud* **2016**, *8*, 252–282, doi:10.1080/17546559.2016.1221119.
9. Edwards, H.G.M.; Farwell, D.W.; Perez, F.R.; Villar, S.J. Raman Microscopy of a Mediaeval Spanish Cantoral. *Appl Spectrosc* **1999**, *53*, 1436–1439, doi:10.1366/0003702991945795.
10. Edwards, H.G.M.; Farwell, D.W.; Perez, F.R.; Garcia, J.M. Mediaeval Cantorals in the Valladolid Biblioteca : FT-Raman Spectroscopic Study. *Analyst* **2001**, *126*, 383–388, doi:10.1039/b008690h.
11. Melo, M.J.; Nabais, P.; Guimarães, M.; Araújo, R.; Castro, R.; Oliveira, M.C.; Whitworth, I. Organic Dyes in Illuminated Manuscripts: A Unique Cultural and Historic Record. *Philosophical Transactions of the Royal Society A: Mathematical, Physical and Engineering Sciences* **2016**, *374*, doi:10.1098/rsta.2016.0050.
12. Tibúrcio, C.; Valadas, S.; Cardoso, A.; Candeias, A.; Barreira, C.; Miguel, C. On the Use of EDXRF and UV–Vis FORS to Unveil the Production of Two Illuminated Manuscripts from the Fifteenth Century Portuguese Royal Court. *Microchemical Journal* **2020**, *153*, 104455, doi:10.1016/j.microc.2019.104455.
13. Duran, A.; López-Montes, A.; Castaing, J.; Espejo, T. Analysis of a Royal 15th Century Illuminated Parchment Using a Portable XRF–XRD System and Micro-Invasive Techniques. *J Archaeol Sci* **2014**, *45*, 52–58, doi:10.1016/j.jas.2014.02.011.
14. Espejo Arias, T.; Lazarova Stoytcheva, I.; Campillo García, D.; Durán Benito, A.; Jiménez de Haro, A. Caracterización Material y Proceso de Conservación de La Colección de Documentos Árabes Manuscritos Del Archivo Histórico Provincial de Granada. *Al-Qanṭara* **2011**, *32*, 519–532, doi:10.3989/alqantara.2011.v32.i2.267.
15. Moura, L.; Melo, M.J.; Casanova, C.; Claro, A. A Study on Portuguese Manuscript Illumination: The Charter of Vila Flor (Flower Town), 1512. *J Cult Herit* **2007**, *8*, 299–306, doi:10.1016/j.culher.2007.02.003.
