# Supplementary material
Source: MDPI journal article supplement (https://www.mdpi.com/2571-9408/7/1/14)
Supplement: s1 [file s1]

Archive with 4 entries (4 files):
- Supplementary material S1 VF.pdf
- Supplementary material S2 VF.pdf
- Supplementary material S3 VF.pdf
- Supplementary material S4 VF.pdf
