# Supplementary material
Source: MDPI journal article supplement (https://www.mdpi.com/2571-9408/7/1/14)
Supplement: s1 [file s1 › Supplementary material S4 VF.pdf]

Supplementary file S4. Folios and areas of analysis

Areas of analysis for FORS (○) and Raman (●)

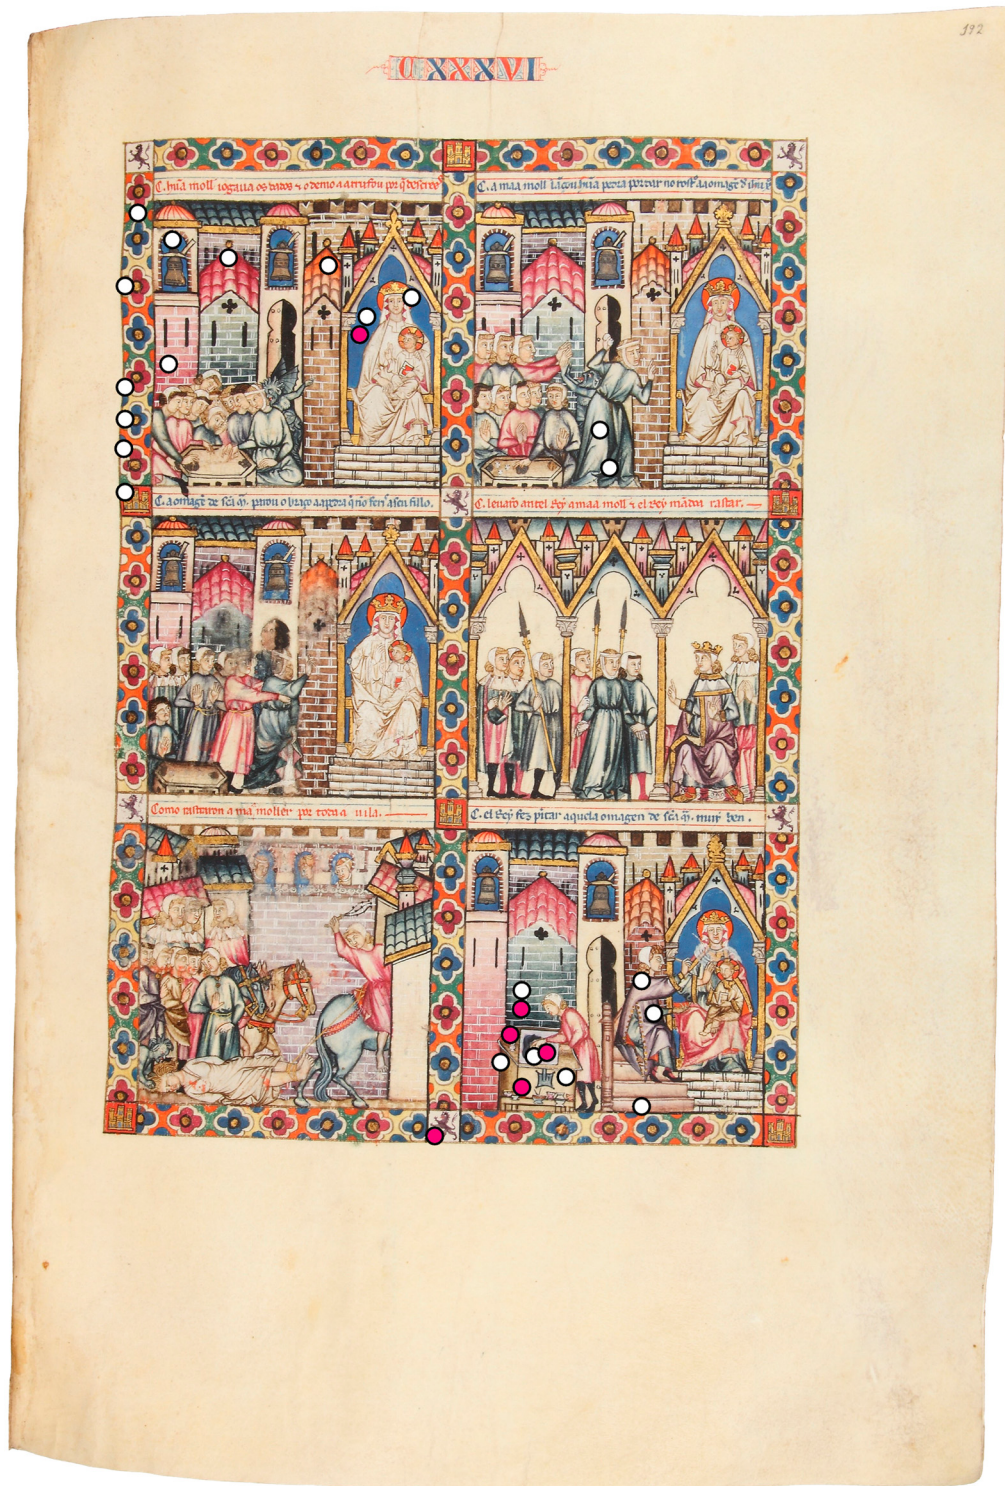

Figure S25. Rich codex, folio 192r, Royal Library of Monastery of El Escorial.

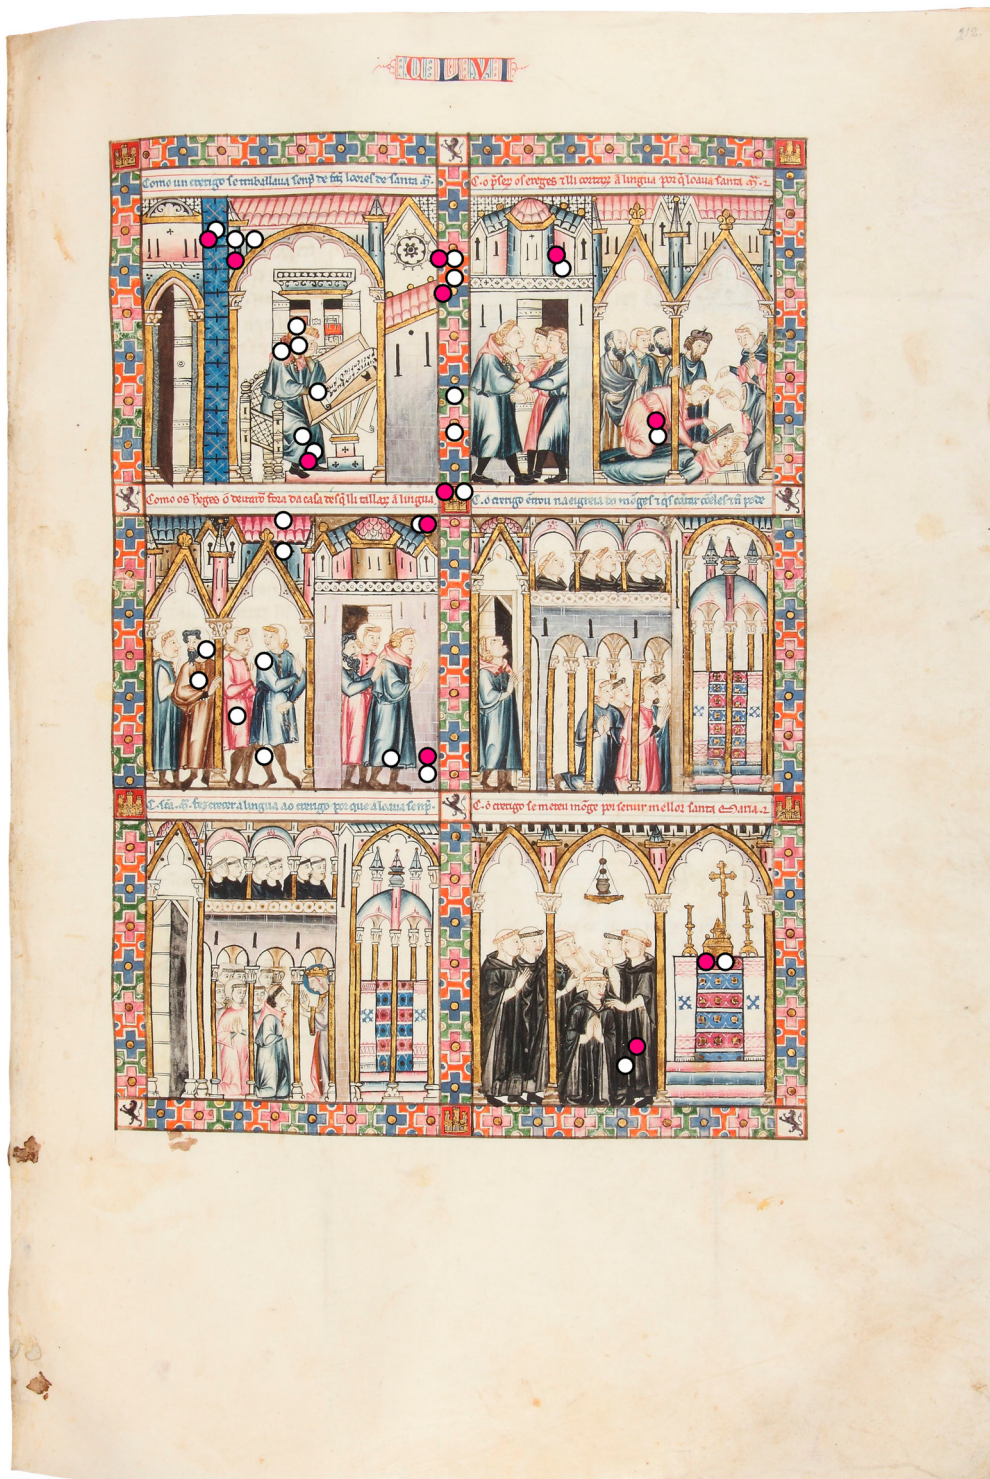

Figure S26. Rich codex, folio 212r, Royal Library of Monastery of El Escorial.

29

Santa maria que est amelloz.  
 ousta que el .e. por agist eu.  
 quero seer op mais seu fhador  
 ergo lle q me queira por seu  
 tobar. ca qm meu tobar  
 reger. a pel qm mostar  
 dos murgres q ela feze ar  
 qm me leuar de tobar de  
 por out dona e auda cobrar  
 pessa qm enas outras pdi  
 ao amor desta senoz e tal.  
 que qno a semp p mais ual  
 epulo graniada non lle fal  
 se no se e pla grando ocaion  
 querendo leuar le: faz mal.  
 capereito oyde e per al non  
 ore dela no me qm partir  
 ca sei de p q sea len senur  
 q non poteri en seu le falir  
 de o auer amica p falir  
 que llo soule co me qm pedir  
 ca tal ngo semp la len oru  
 ndelle ngo se la quiser  
 quelle praza do q dela diller  
 en mes citares e sellapruier  
 que me de gualardo comelada  
 aos q ama equeno souler  
 por ela mais de gualdo tobara.

Esta e a primeira cançã de loz  
 de Santa maria emencando os .xij.  
 goyos que ouue de seu fillo .xiii.

Estege mais  
 queru to  
 bar. pla sennoz enriada. enque  
 deus quis carne filiar. bēptra  
 7 sagrada. por nos dar gran sol  
 dada. no seu reyno 7 nos er

Figure S27. Musicians' codex, folio 29r, Royal Library of Monastery of El Escorial.

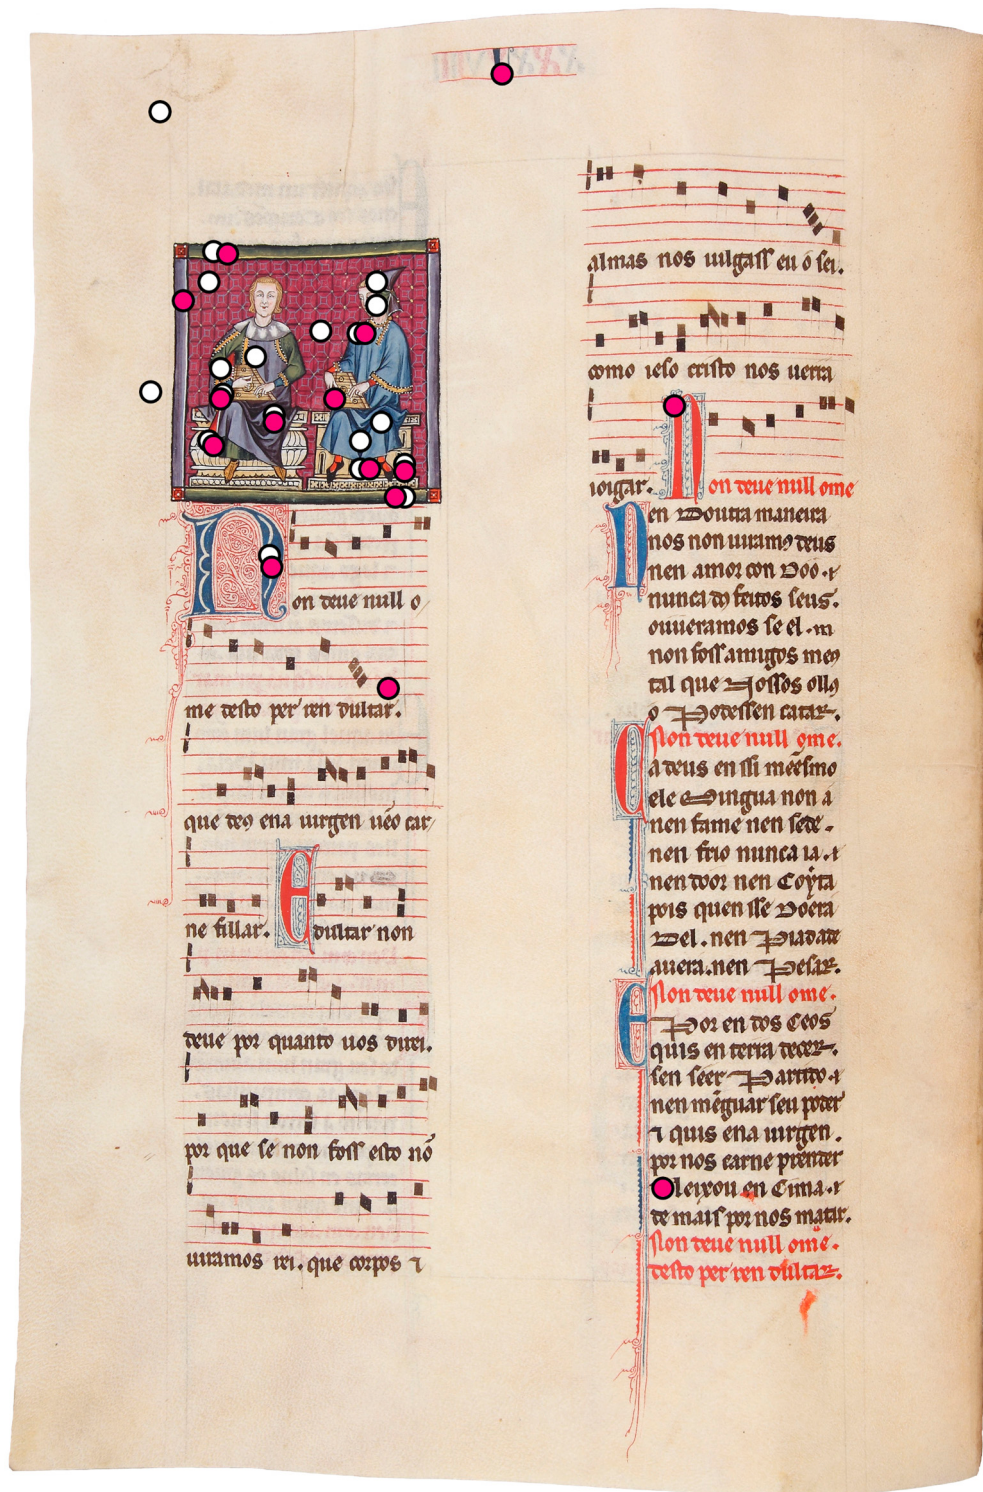

Figure S28. Musicians' codex, folio 71v, Royal Library of Monastery of El Escorial.

Logo o que mandou ela foi feito.  
 São preste sabia de tal preito.  
 por tal lingua ouo em conueto  
 Ne fez falar para uoa certa.

**S**anta e **S**ana enfermos sã  
 e os sãos nua te — via — via —  
 pois sapida ouue regebuda —  
 diz agnan uos madre de d'sauida  
 a oten semo que a conuogida.  
 ata grãci. e cantou antuaã.

**S**anta e **S**ana enfermos sã  
 e os sãos nua te uia — via.

**S**antos aqueste miragre soulerõ  
 a Santa e **S**ana Loores de uon  
 e tantos aa egrua ueeron.  
 que non cabian p'nen ena q'ntaã  
**S**anta e **S**ana enfermos sã.  
 e os sãos nua te uia — via.

sta e de Loor de Santa e **S**ana dis  
 p'naq' lerems que a no seu nome. e  
 que querem dizer.

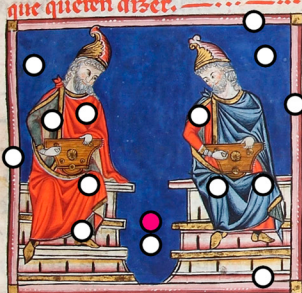

**E**no nome de  
 maria p'naq'

letras no mais p'na most  
 maior e maior e mais manfa  
 e mais mellor de quantal fez  
 nostro señoi nen que fazer  
 podena.

**E**no nome de **S**ana  
 demosta auogada —  
 apsta e a orada.  
 e amiga e amada —  
 da muu Santa cõpania

**E**no nome de maria  
 demosta um e rapz  
 p'cey n e empadiz.  
 tola do mudo e fuz  
 quena uille le s'ena

**E**no nome de maria  
 nos mostra ihu xpo.  
 iusto iupz e p'risto  
 foi p'ela de nos iusto  
 segun d'isso p'lipa.

**E**no nome de maria  
 ar diz que aueremos  
 o que tod acabaremos  
 aq'elo que nos q'remos  
 de deus p'is ela nos guia

Figure S29. Musicians' codex, folio 89r, Royal Library of Monastery of El Escorial.

This manuscript page, folio 304v, is from the *Musicians' Codex* (Royal Library of Monastery of El Escorial). It features a large, ornate initial 'D' in blue and red, decorated with white dots. The text is written in a Gothic script, and the musical notation is in square neumes on a four-line red staff. The text is a liturgical or devotional piece, likely a Mass or a hymn, and includes the following Latin text:

Dignen madre  
 gloriosa. te deus filia  
 espro. tanta nobre pocio  
 la. quente loar fatena.  
 ou proia. a deus que e  
 tua. e dia. segundo a nossa  
 namta. non uitamos la  
 figura. se non por ti que

The page also includes a small illustration of a figure, possibly a saint or a religious figure, in the upper left corner. The text is written in a Gothic script, and the musical notation is in square neumes on a four-line red staff. The text is a liturgical or devotional piece, likely a Mass or a hymn, and includes the following Latin text:

fuit alia. *uirgen marie*  
 gloriosa. te deus filia.  
 u es alia tos alioes  
 que fasei os peccatoes  
 que ueian os seueros  
 iadnosca la folia. qdela.  
*uirgen marie gloriosa*  
 auer om o que deua.  
 que perreu p la louar  
 Eua que tu igrn pur  
 cobaste por que et alia.  
*uirgen marie gloriosa*  
 u es alia tos melqre  
 que no eren os campe  
 a grantes a pquente  
 anilletimts aua. p qm  
*uirgen marie gloriosa*  
 teu fillo toda. via.  
 que nos sacurta ceta.  
 carrena. m. a. 7. d. m.  
 per ti que es nossa alia.  
*uirgen marie gloriosa*  
 u es alia tos culpato  
 que cegos por se peccat  
 eam. m. a. l. a. m. e. a. d. s.  
 so p ti. s. a. h. a. n. d. i. n. a.  
*uirgen marie gloriosa*  
 en auen ofimar pteua  
 ten. ten. a. ta. g. n. m. e. s. u. r. a.  
 ca. s. e. m. p. r. e. e. n. t. i. p. a. n. i. m. a.  
 tes. a. l. u. z. o. n. d. e. s. t. u. a. l. i. a.  
*uirgen marie gloriosa*  
 u es alia per que mto  
 sei o sol que este mto

Figure S30. *Musicians' codex*, folio 304v, Royal Library of Monastery of El Escorial.

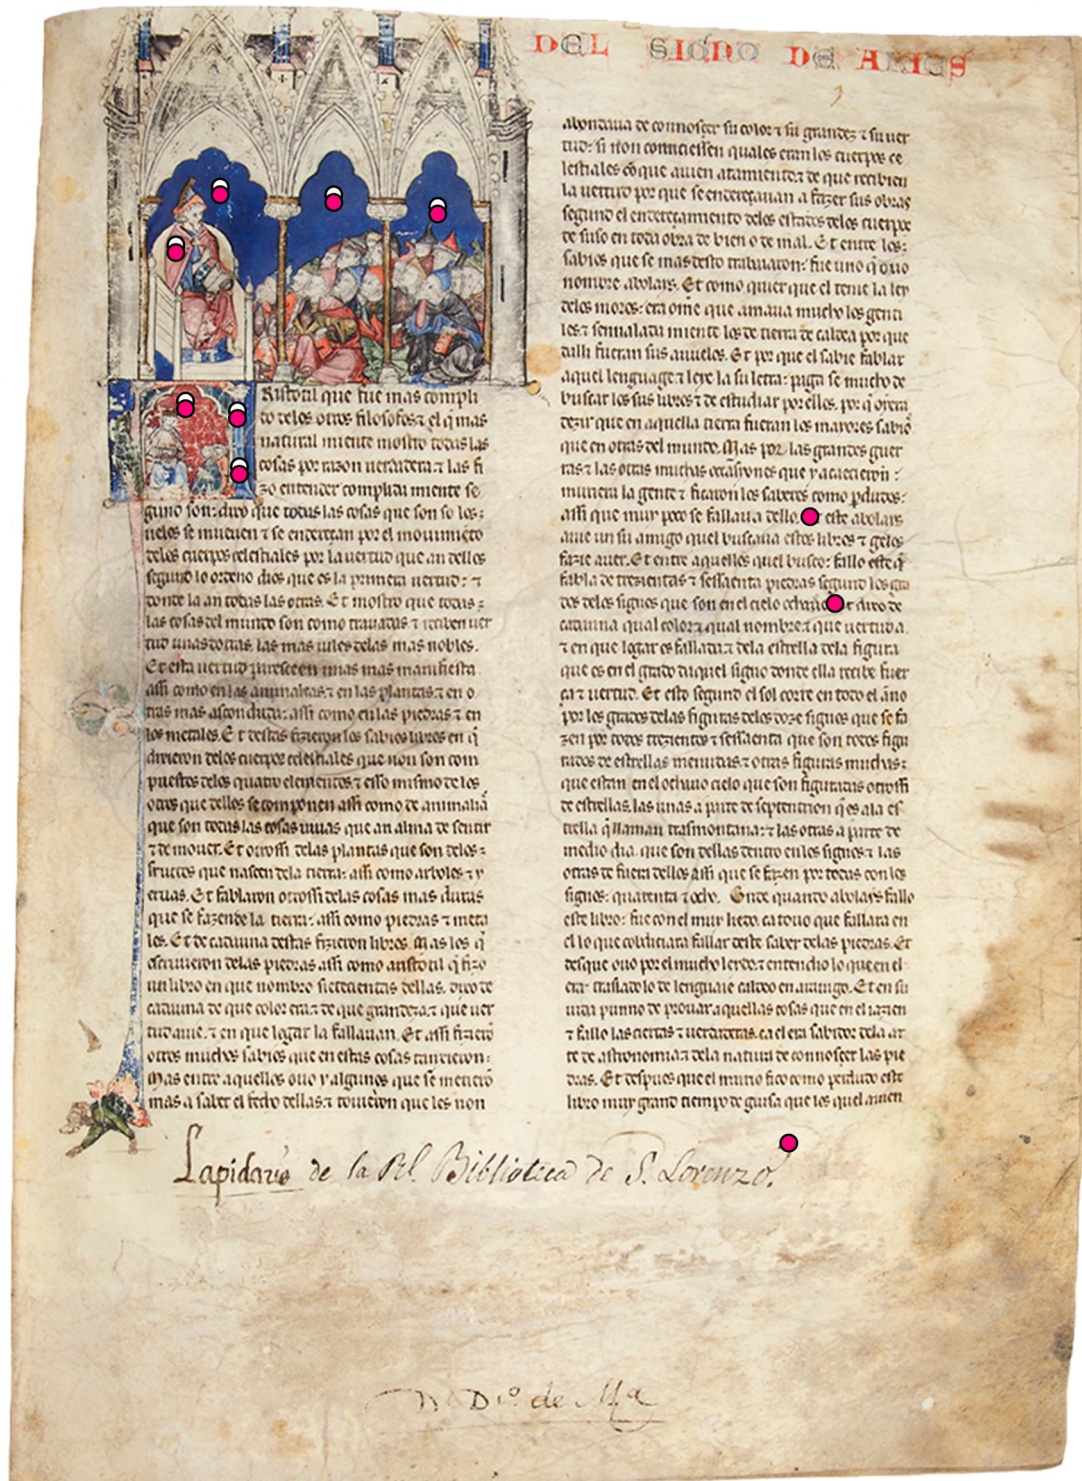

Figure S31. Lapidary, folio 1r, Royal Library of Monastery of El Escorial.





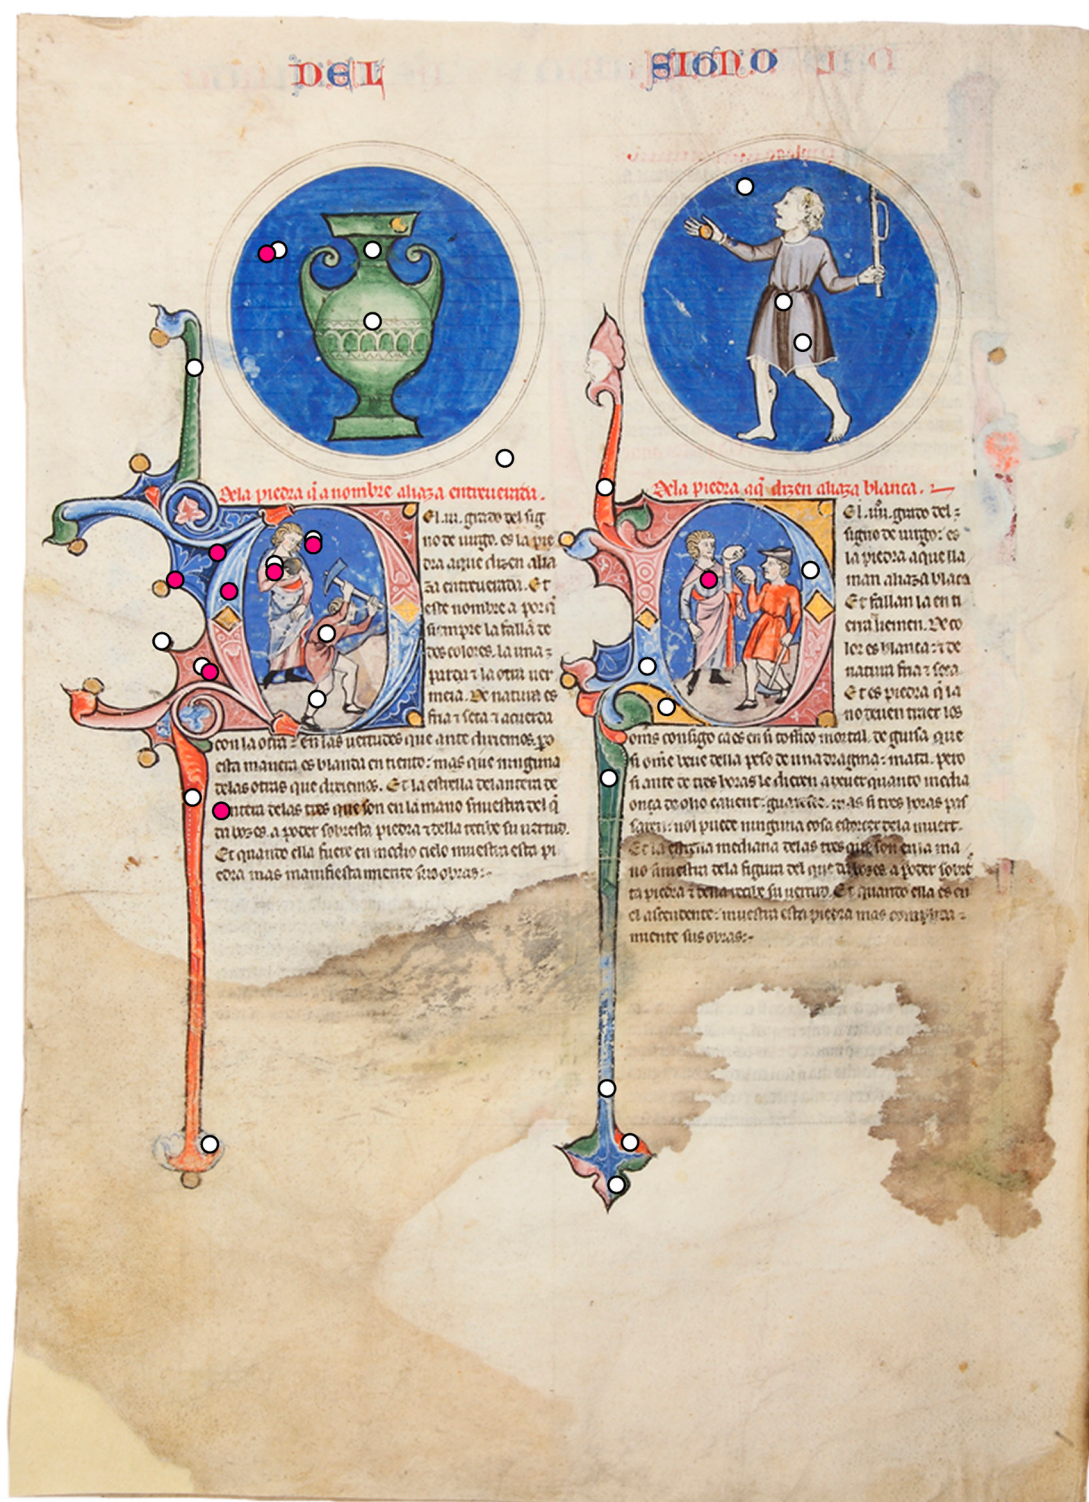

Figure S34. *Lapidary*, folio 41v, Royal Library of Monastery of El Escorial.

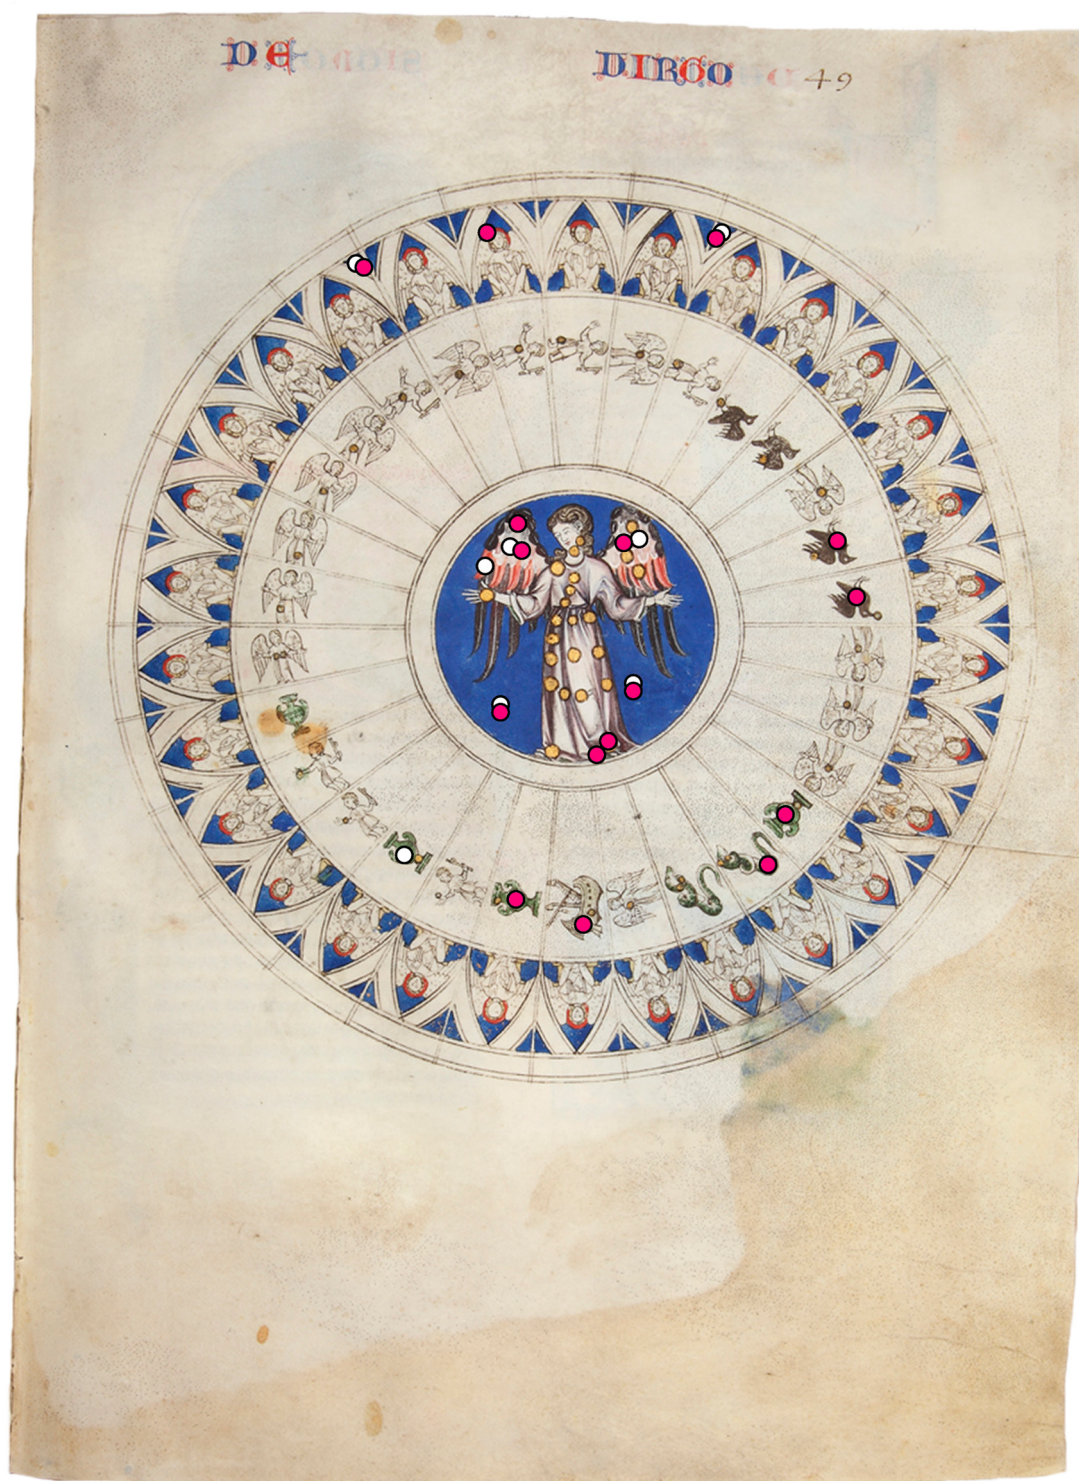

Figure S35. *Lapidary*, folio 49r, Royal Library of Monastery of El Escorial.

DEL

SIGNO

si dixeran de ella a deuter peso de una dragma al que la  
beue faze el perder toda la fuerza del refrenamiento del  
estomago: et apenno de comer: si por fuerza quiere  
comer o deuter alguna cosa: alo de camiar luego. Et  
de ella guarda esta fusta que muere. Et esto mismo fa-  
ce al que la tiene consigo: ca en muerdo la faze perder el  
fuerdo de oter de maneta que no buelle ninguna co-  
sa: no tan sola miente faze esto en las animalas:  
mas sobre las otras cosas en que la pongan. Et las  
cos cistelas la que se postremeta dela cora sinestra a  
la cora machana de los pies que son en el pie sinestro  
del q tiene el ynoio fiado an poderen esta piedra: del  
las vende la fuerza: la uerda. Et quando son en el  
asistente: muetm esta piedra mas mamfiesta:  
miente sus obras: -

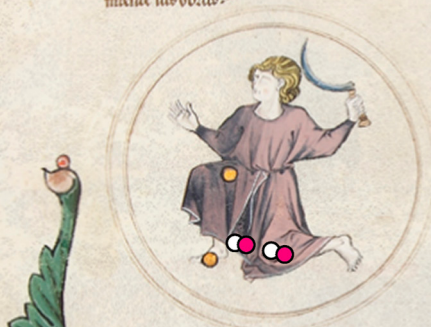

De la piedra aque llaman **tarnisien**.

Et vna, quando del  
signo de escorpion es  
la piedra aque dize  
tarnisien. Esta es  
en forma de ueneta.  
cuando del una pira  
del otra ueneta. Et  
della ay grandes  
et otras pequenas.  
De otro es uerda q  
un a amariello: gotada de gotas uenetas. falla  
tu es en un lugar aque llaman la cueua del paraiso  
que es en el comengamiento dela tierra de promissio

peta dela tierra del rio aque dize en laton: et en esta  
cueua sobre dicha a muchas maneras de culiebras  
et de serpientes: ay unas maneras de ellas q son luc-  
gas: un palmo en ferriente de bueltas: an tal  
pueden que quando la planeta mans se alza sobre  
nena: an uerda tan esquivas: si qui las ore luego  
muere: por eno los oms de quella tierra q saben el  
co: deuan se de pafar: co: tan quella cueua en anlla  
sazon. Et estas piedras que yeren en aquella cue-  
ua no las pueden enre auer si no de la guarda. que  
quando crece el rio por garro aguaducto: en que en  
aquella cueua: mte la a: quando mangua: sale el  
agua dela: mte consigo estas piedras. Et segund es  
la resedumbre del agua que dela sale: asy hallan  
las piedras grandes o pequenas: et la uerda del rio.  
et de la guarda las pueden auer: no tocan. ca en la  
cueua no pueden entrar: por los pengros que son  
dichos. De natura es fina: hama: leue de neta: yeta  
ta. Et quando la meten en el fuego: qmas arna: y mana  
de color qurda. humana es: y pofa: a si la muelen desque  
q es qmado: mte dela un poco sobre fierro: o sobre otra co-  
sa: al leua del fender: fize ello: fize o lo nra: o una arma  
qmas qer: finere co: ella a alguna animal de guarda q sala la  
que: mangua: y uerda enre guante: muer. Et lo mismo fa-  
ze de ella a alguno: a deuter: falla dize: en el cuerpo: algu-  
na de fionadum: o logar poco pucha: llegar ala sangre: ca  
luego q r llega: mami segund es dicho. Et la piedra q en el  
ombre sinestro del q tiene el moio fiado a puer en esta  
piedra: dela vende la uerda. Et qno es en el asistente:  
muetm esta piedra mas obuda miente sus obras: -

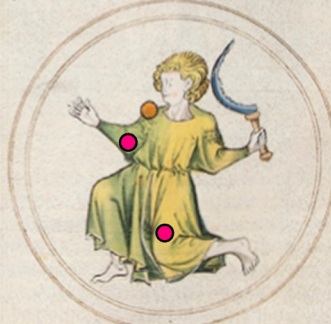

Figure S36. *Lapidary*, folio 62v, Royal Library of Monastery of El Escorial.

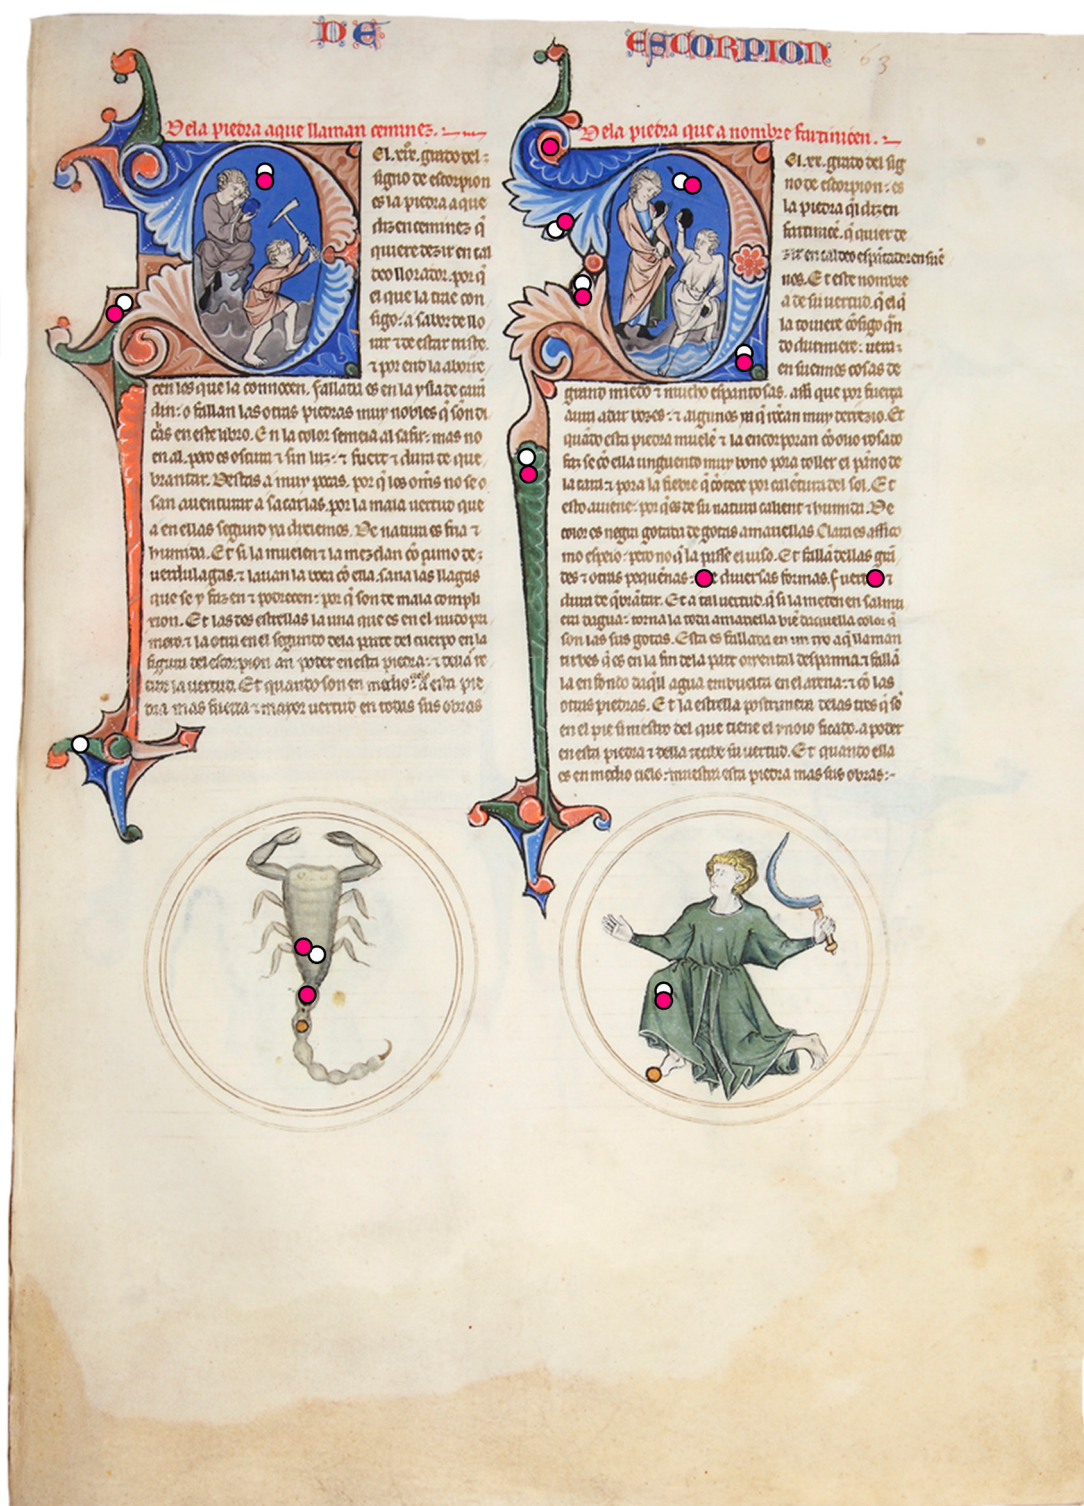

Figure S37. *Lapidary*, folio 63r, Royal Library of Monastery of El Escorial.

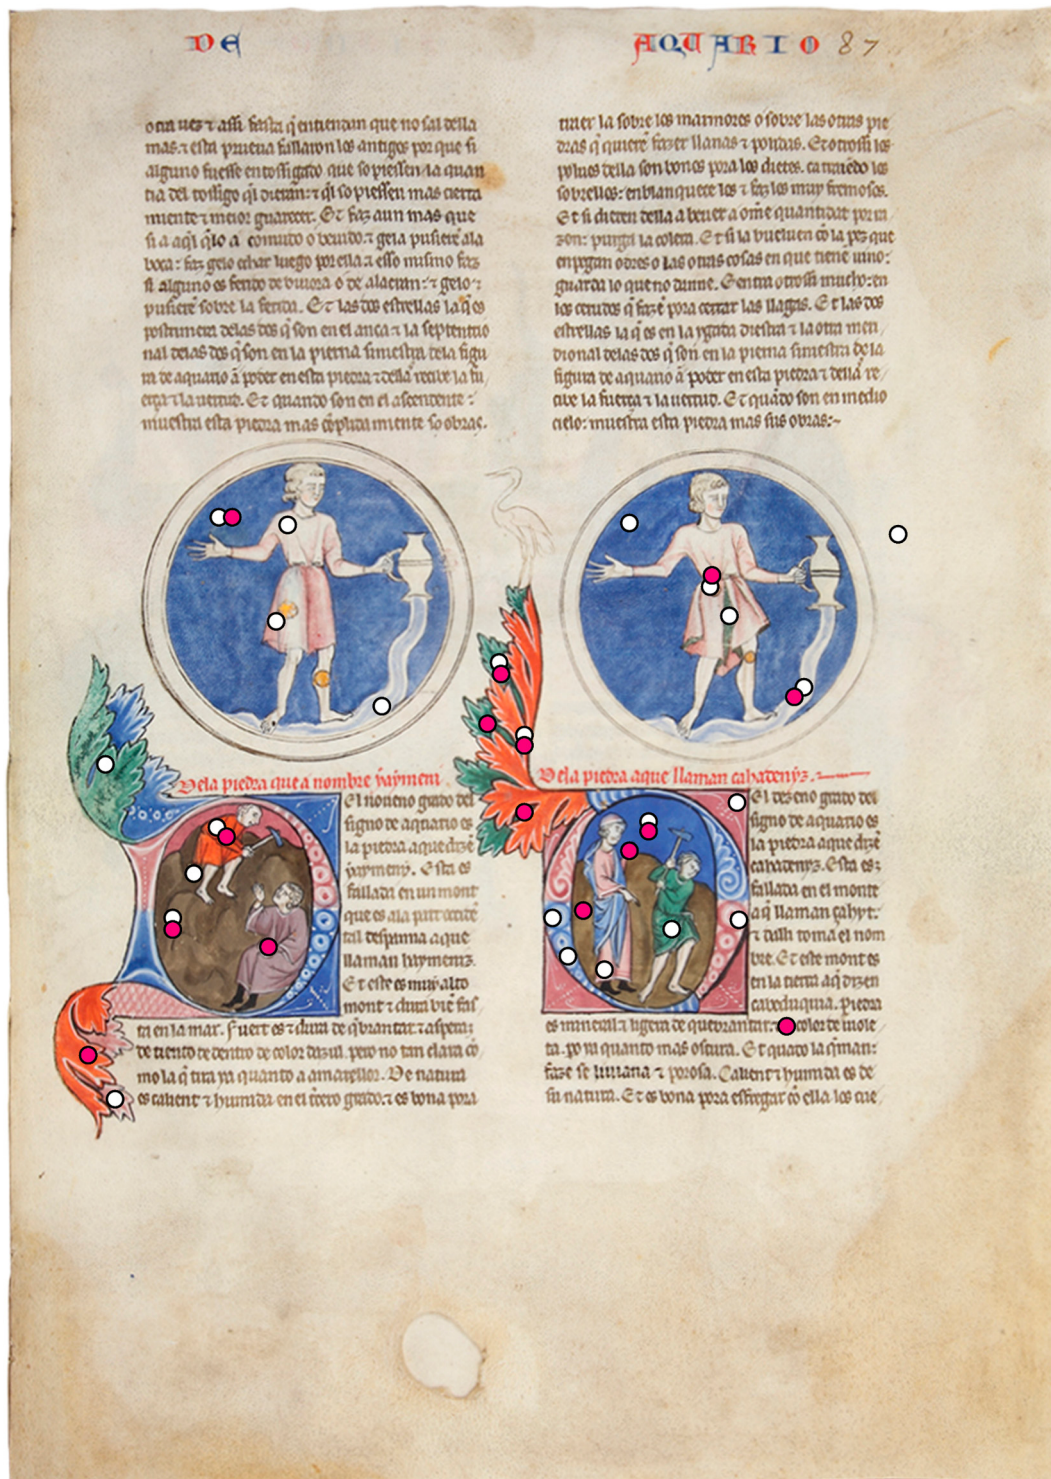

Figure S38. *Lapidary*, folio 87r, Royal Library of Monastery of El Escorial.

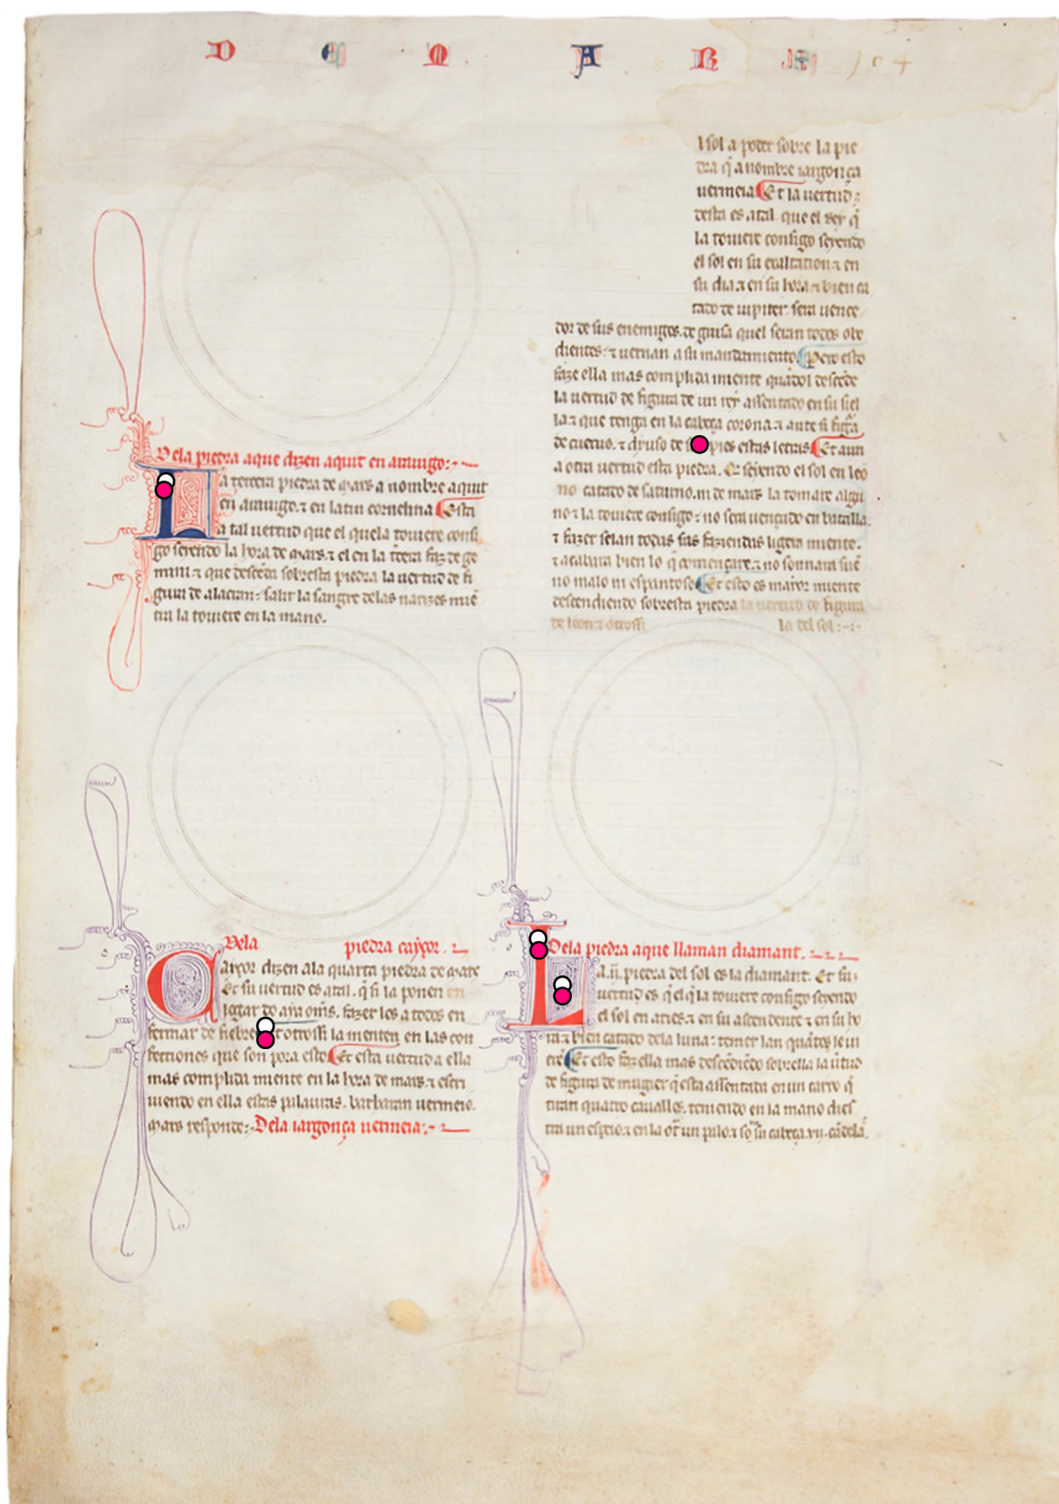

Figure S39. Lapidary, folio 104r, Royal Library of Monastery of El Escorial.

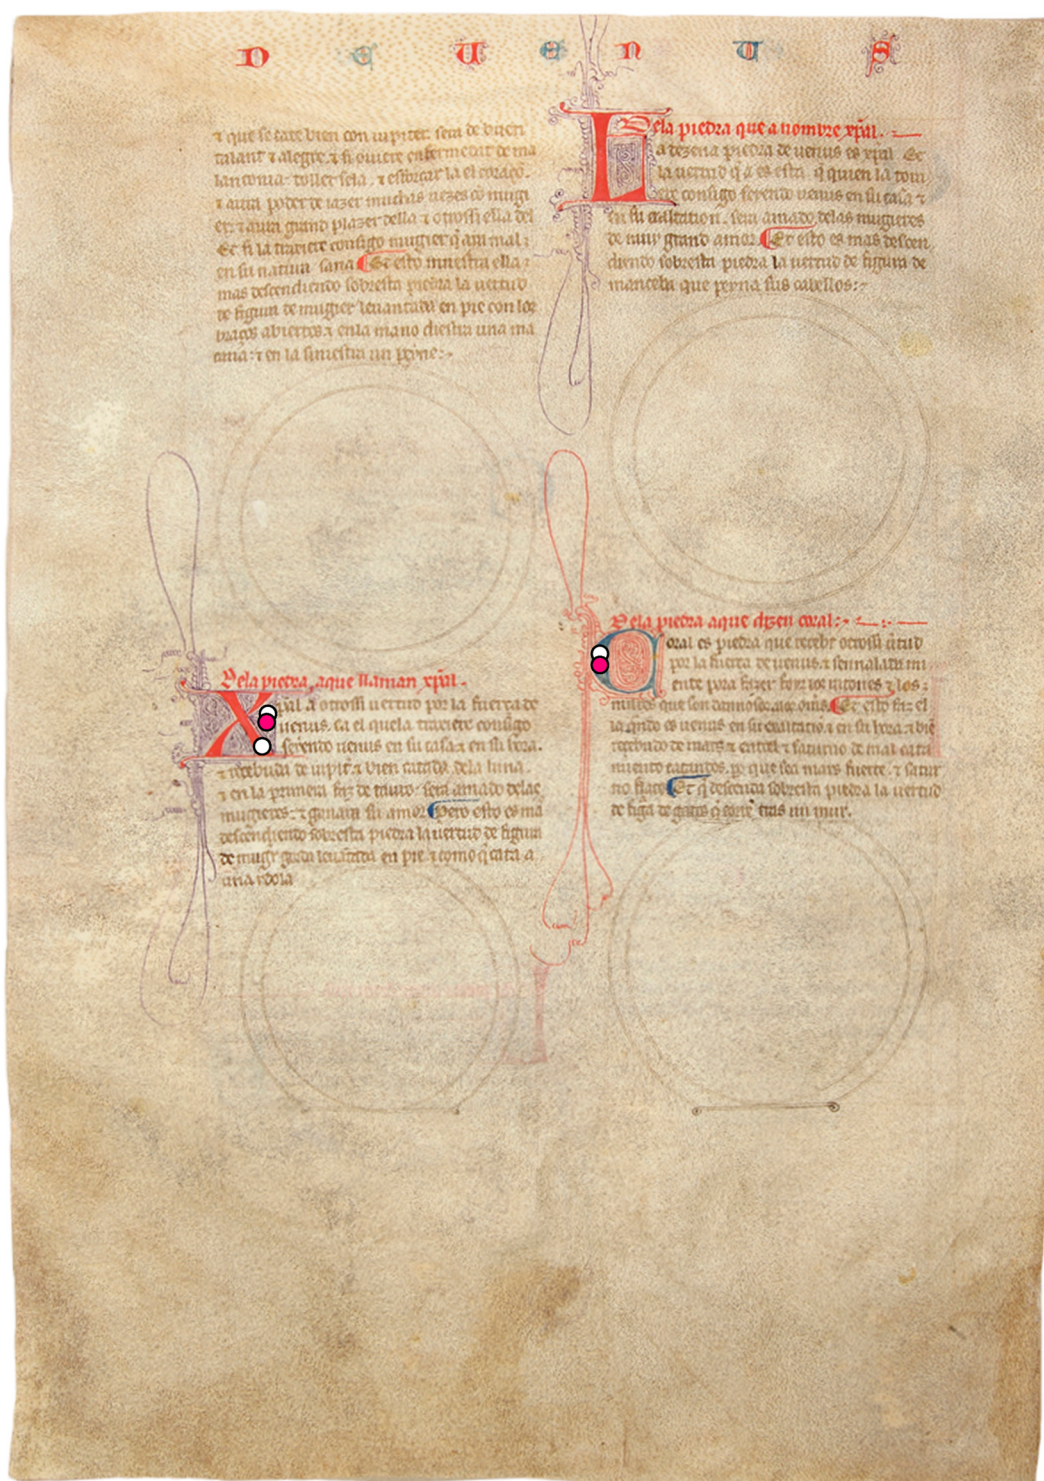

Figure S40. Lapidary, folio 106v, Royal Library of Monastery of El Escorial.

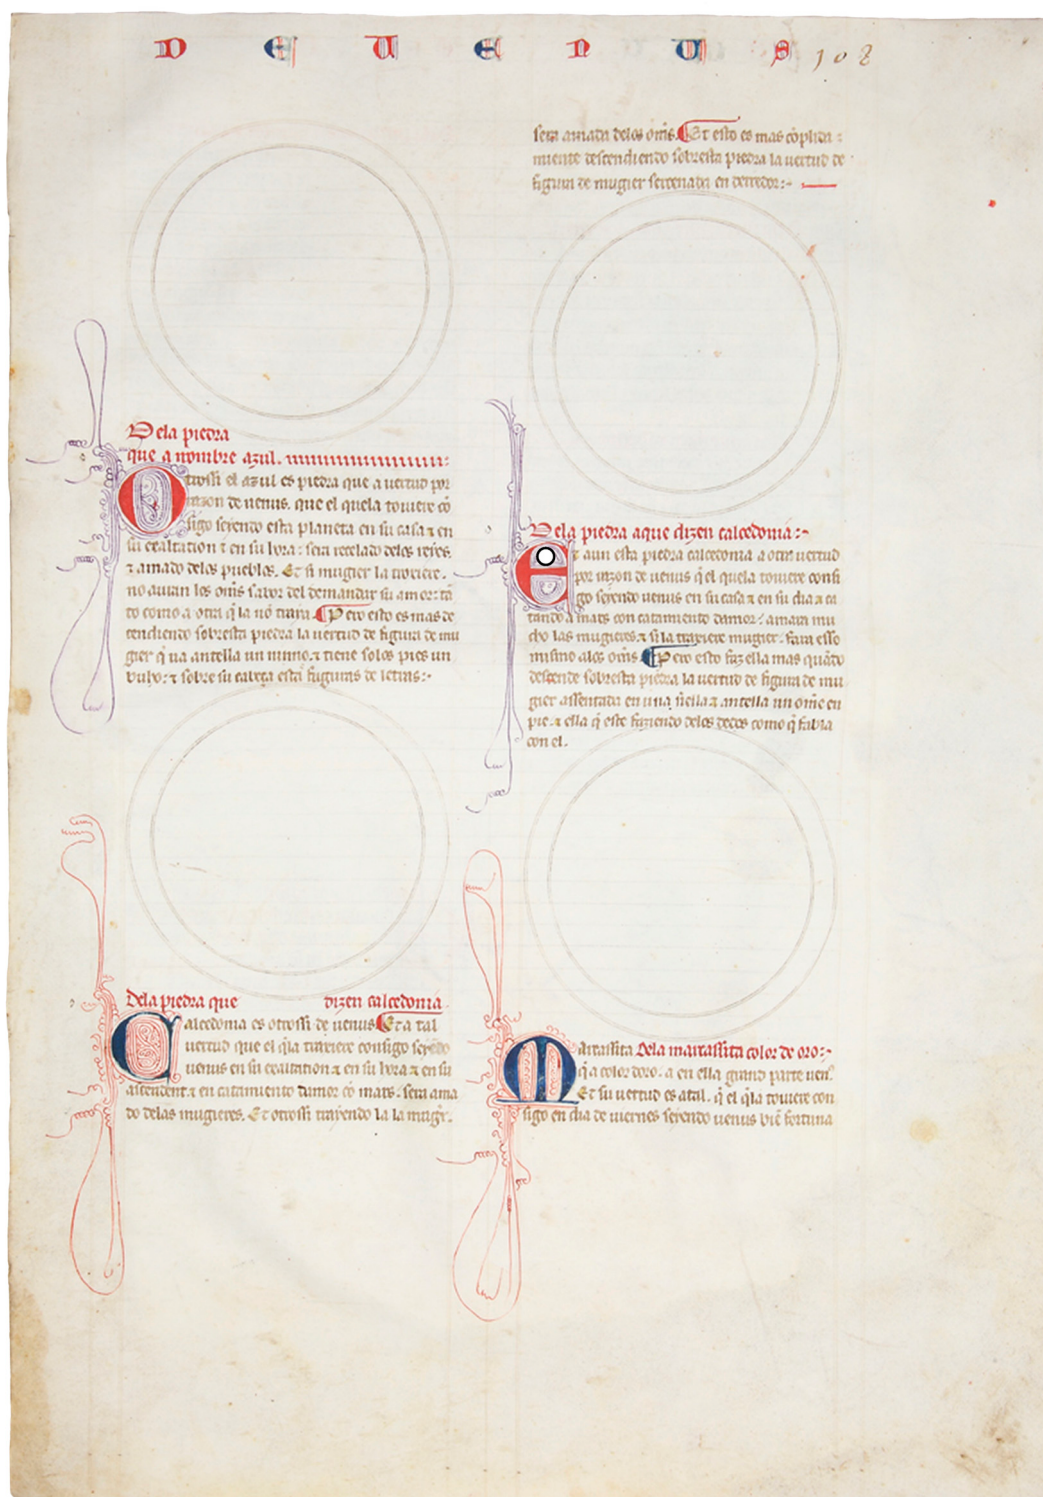

Figure S41. Lapidary, folio 108r, Royal Library of Monastery of El Escorial.

que este nombre aue ella por que uia  
sobrel agua que se non affonda. en ella.  
sepindo dura et pesada. **E**t dize quel vi  
rietan. que quien aduierle esta piedra  
configo. que sera muy bien recebido del  
reya de su muger. i de los omnes. **De la**

**septa piedra de t.** **E**t a nombre en griego la septima  
piedra de la t. **E**t en arauigo aui  
ca. **E**t dize malomath et sobre dicho q si  
fregaren con ella el cuer que rabe el cabel  
lo del. **E**t otrosi los odicos fregan con  
ella los odicos. por los faser mas leues. **E**t  
si fregaren con ella el cuerpo. meta el cabel  
lo del. **E**t aui a en ella otra uirtut. que  
si la aduierre colgada de si el qui ouiere la  
fiebre. tirarla a su suor. **E**t si diere  
abeuer lo que saliere de su fregamiento.  
con el agua. al que ouiere calentura tirar  
ge lo a. **De la viii. piedra de la t.**

**O**rs disen en griego a esta viii. pi  
piedra. **E**t llaman la en arauigo  
acelun. i es blanca asmeianca de marinoz.  
et faser de la ualos pora los reyes. **E**t non  
quier que se llegue a ella ninguna uirtut.  
ca a qual quier logar della que se llega. re  
negrese luego. i nunca esclarece. **E**t si  
molieren esta piedra i la metieren con el a  
postoligon blanco. enfligara las postemas. i  
las llagas. en que a mucho ueneno. i ageta  
la matia. **E**t si lo temer alguna muger.  
secarle la leche. i disen que taia la flor  
de la muger. **E**t la muger que lo temer.  
uear la el emprehnamiento. **E**t el temer  
della. es peso de una dragma. o mas o me  
nos segund la complexion de la muger.  
et la ora i el tumpo en que fuer. **E**t esto  
sera segund el seso et la sapiencia de saber  
el tiempo i la fazon i la edat de quella q  
la da abeuer. **De la ix. piedra de la t.**

**O**rs disen en griego. ala. **E**t en arauigo. piedra  
de la t. **E**t es blanca asmeianca de  
cristal. pero es un pax mas oscura. **E**t uide  
la en los aniellos. por que a tal uirtut que  
que el qui la tomere consigo. sera bien rece

bido de los reyes. **E**t si ouiere en ella  
figura de loto enfiernado. fecr lo a de todos  
los omnes. **De la primera piedra de la y.**

**P**oniolo. **E**t llaman en griego. a  
la primera piedra de la y. **E**t  
disen le otrosi goma daltelat.  
por que la fallan en una uilla de altran  
dina que a asfi nombra. **E**t es de muchas  
colores. i non la fallan si non en aleuin  
dina. **E**t su uirtut es que presta al que  
a la postema. a que non puedra dar con  
fio los phisicos. fregando la con agua. et  
untando con lo que saliere della. el logar  
de la omne tiene. la dolor. **De la. segun**

**da piedra de la y.** **E**t a nombre en griego. la  
segunda piedra de la y. **E**t semeia  
al coracon de una que. a que disen eacmoz.  
**E**t qui fregare esta piedra i diere abeuer  
lo que della saliere al que ouier dolor del  
figado tirara lo a. **De la. tercera piedra**

**de la y.** **E**t a nombre en griego. a la  
tercera piedra de la y. **E**t es piedra  
que tira a uerde. **E**t presta a los curados  
et alas tristicias. trayendo la omne consigo  
esta semeianca de piedra es su uirtut. falla  
mos en la. ta. salio endo que refuana en  
el nombre. **De la. iiii. piedra de la y.**

**E**ltz. a nombre en griego. la quarta  
piedra de la y. **E**t es mineral por  
natura. i la color della semeia a todas colo  
res. i tira yu quanto asmeianca de oro. i  
qui quier que la aduierre consigo. sera  
seguro de todos los bestiglos malos. **De la**

**v. piedra de la y.** **E**t a nombre en griego. ala

**quinta piedra de la y.** **E**t presta al color  
de las puntas fuertes trayendo la omne  
colgada consigo. **De la. vi. piedra de la y.**  
**E**ltz. disen en griego. ala sexta pi  
edra de la y. **E**t es fermosa. i apu  
esta de color. i presta al color de las puntas  
del cuerpo. i asselega al affogamiento que

Figure S42. Lapidary, folio 116v, Royal Library of Monastery of El Escorial.

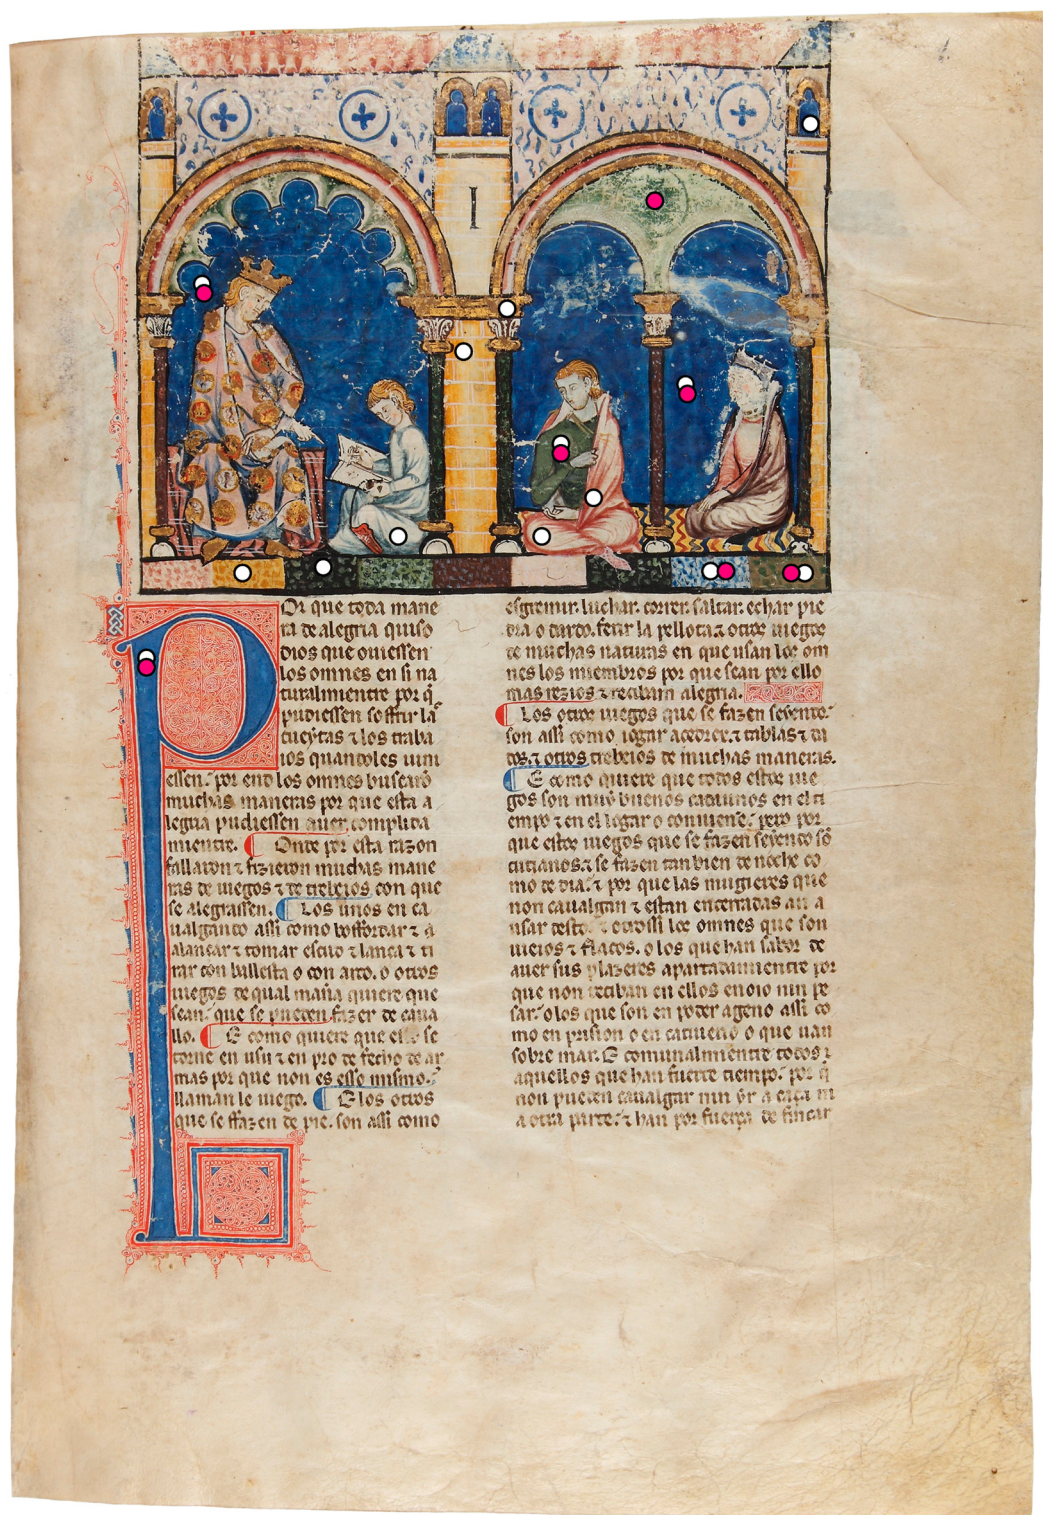

Figure S43. Book of chess, dices and tables, folio 1r, Royal Library of Monastery of El Escorial.

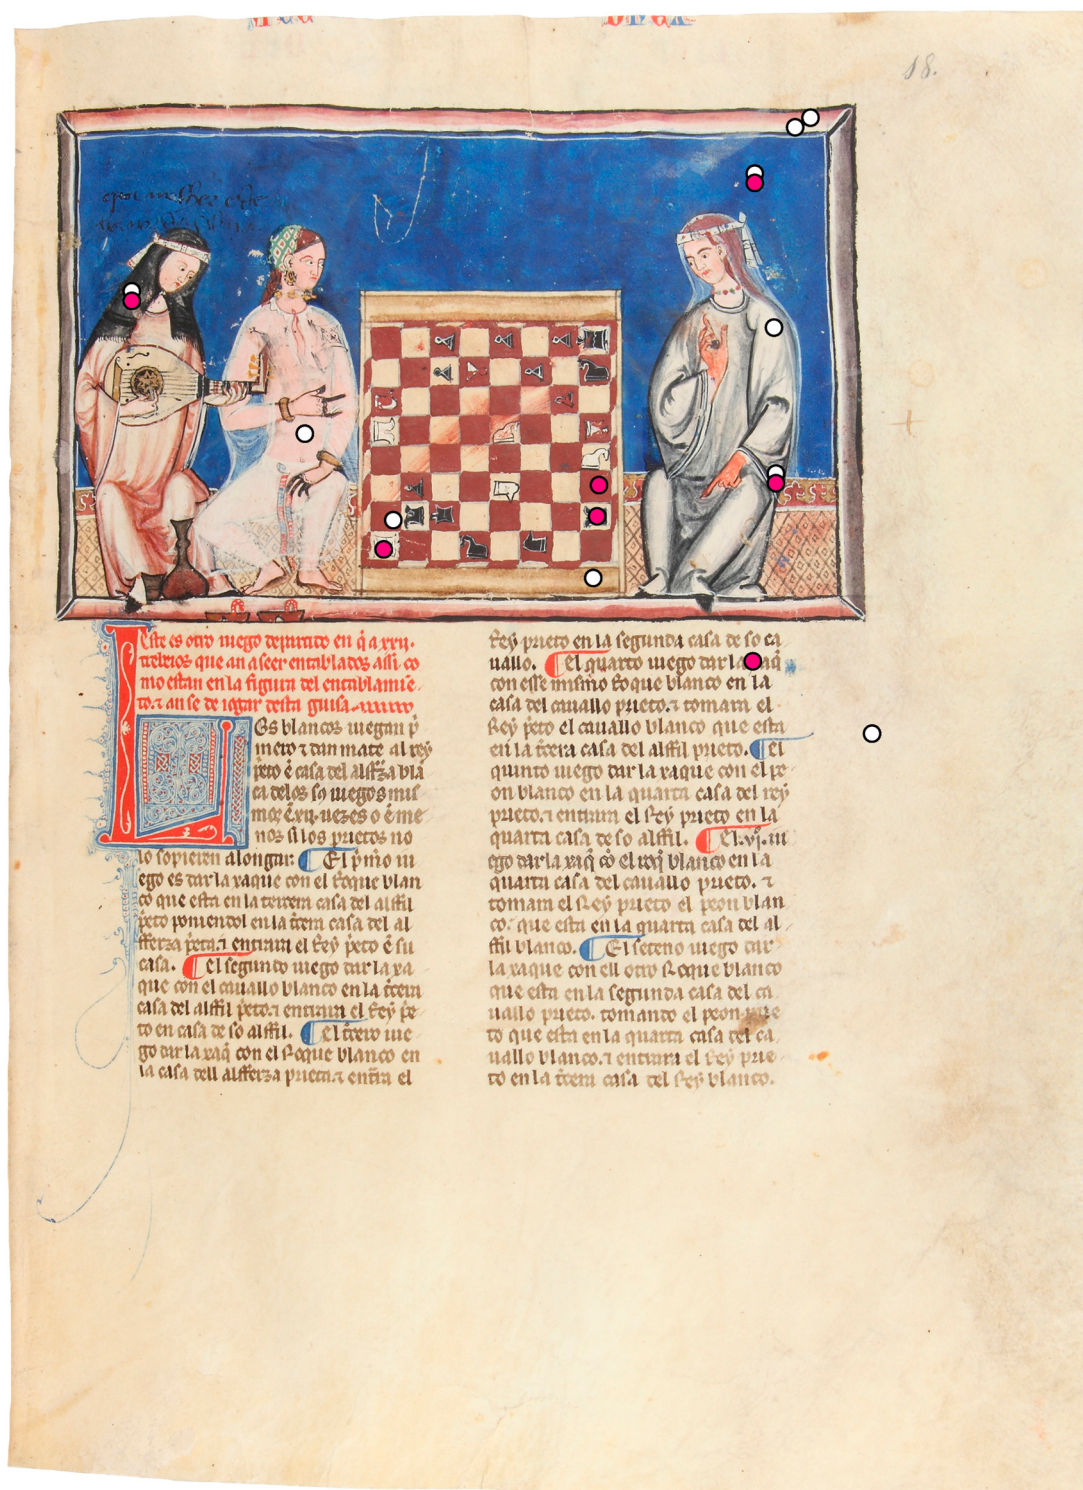

Figure S44. Book of chess, dices and tables, folio 18r, Royal Library of Monastery of El Escorial.

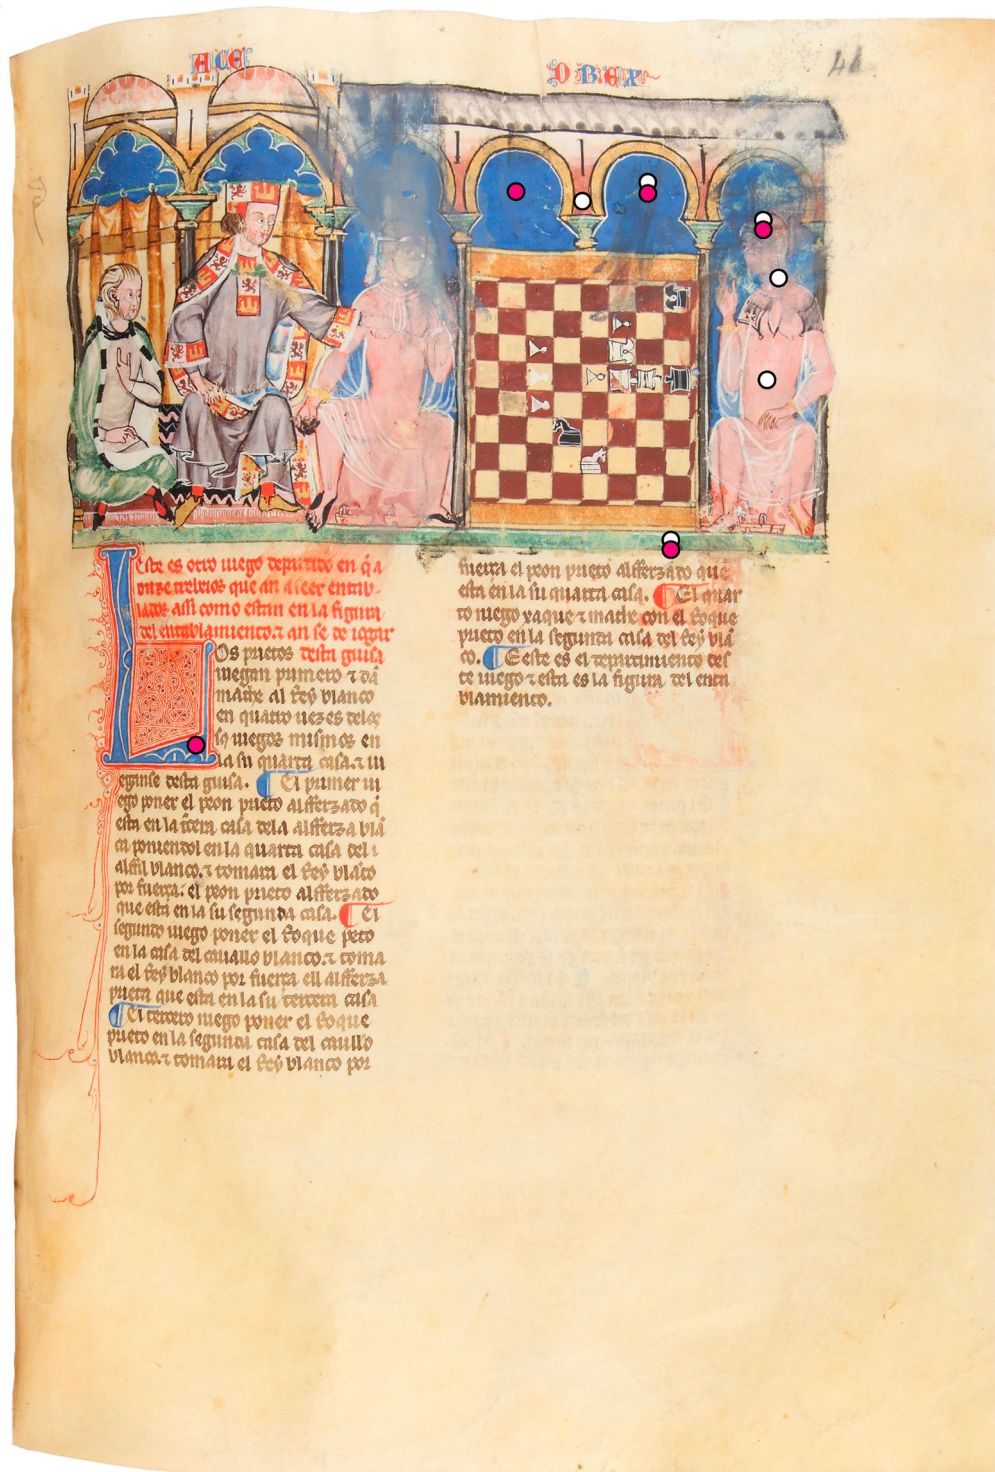

Figure S45. Book of chess, dices and tables, folio 48r, Royal Library of Monastery of El Escorial.

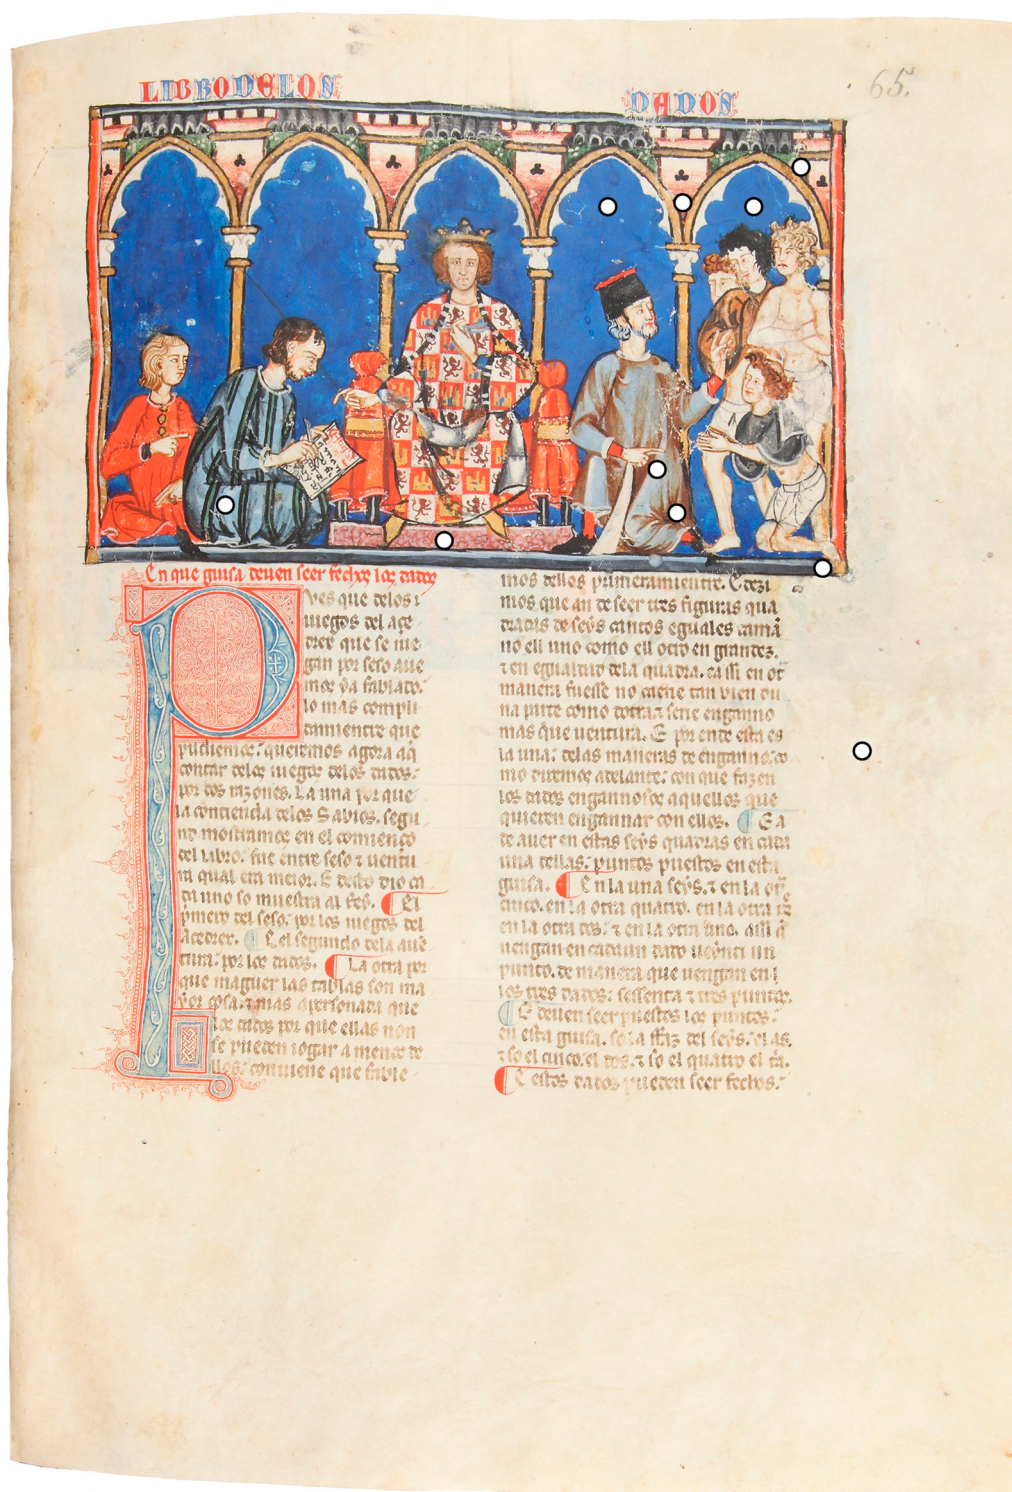

Figure S46. Book of chess, dices and tables, folio 65r, Royal Library of Monastery of El Escorial.
